# Supplementary material for: Whole-exome sequencing identifies germline mutation in TP53 and ATRX in a child with genomically aberrant AT/RT and her mother with anaplastic astrocytoma
Source: PubMed Central journal article supplement — Cold Spring Harb Mol Case Stud. 2018 Apr;4(2):a002246. doi: 10.1101/mcs.a002246 (PMC5880256; doi:10.1101/mcs.a002246), 2018-04
Supplement: supp_mcs.a002246_Supplemental_Figure_2.pdf [file supp_mcs.a002246_Supplemental_Figure_2.pdf]

Child (FFPE)

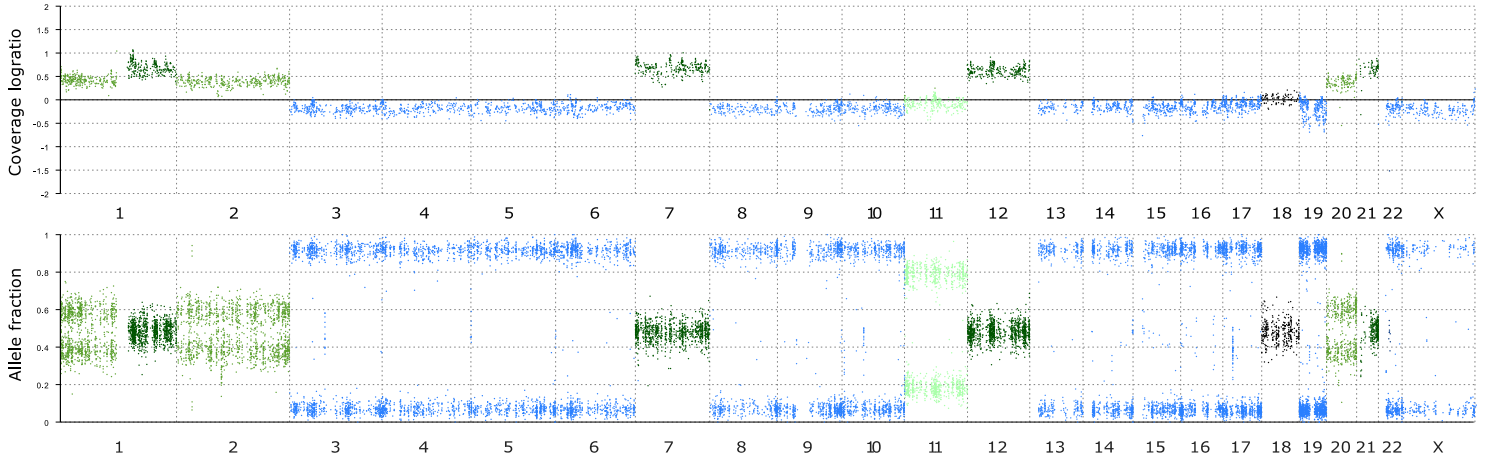

Child

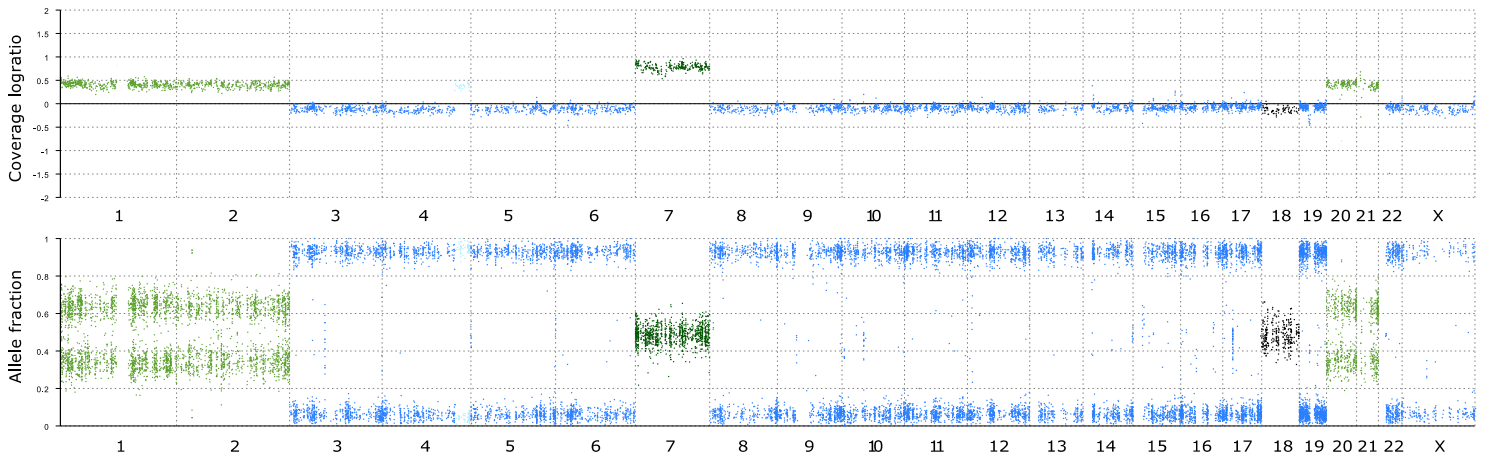

Mother

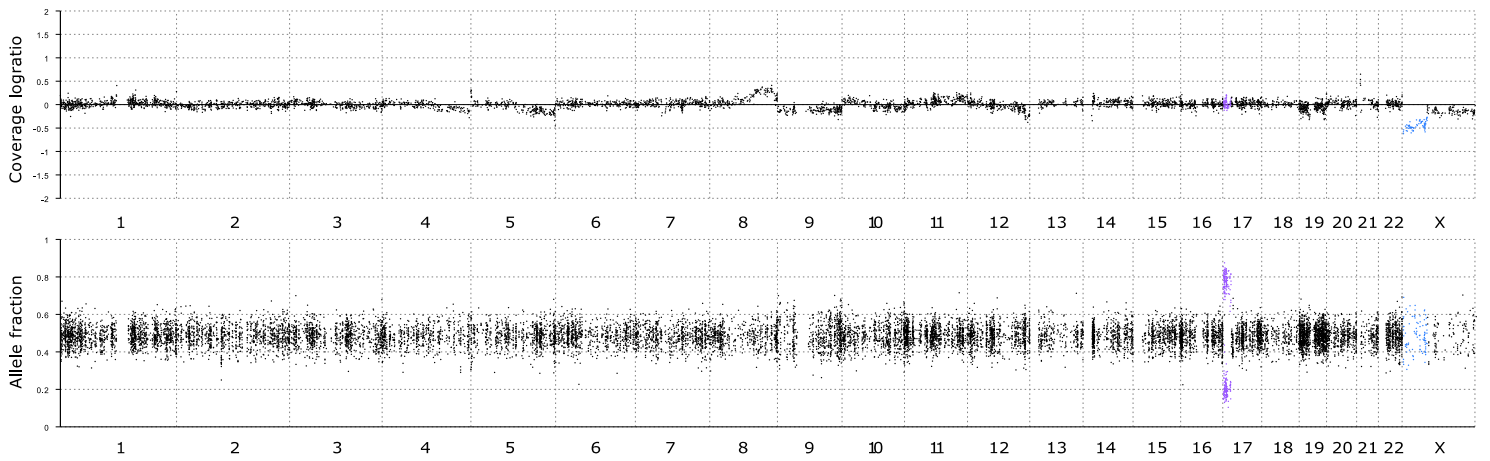

**Mother**  
Copy number alteration

- Hemizygous deletion
- Normal
- Copy-neutral loss of heterozygosity

**Child**  
Chromosomal count

- AABB
- AAB/ABB + AABB
- AA/BB + AABB
- AB
- AAA/BBB
- AA/BB
- -
