# Supplementary figures and images for: Whole-exome sequencing identifies germline mutation in TP53 and ATRX in a child with genomically aberrant AT/RT and her mother with anaplastic astrocytoma
Source: PubMed Central journal article supplement — Cold Spring Harb Mol Case Stud. 2018 Apr;4(2):a002246. doi: 10.1101/mcs.a002246 (PMC5880256; doi:10.1101/mcs.a002246), 2018-04

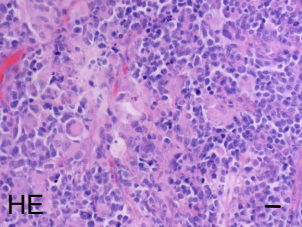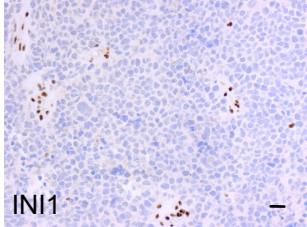

Supplement: supp_mcs.a002246_Supplemental_Figure_1.pdf [file supp_mcs.a002246_Supplemental_Figure_1.pdf]
